# Supplementary material for: Characterization of a Monoclonal Antibody Directed against Mytilus spp Larvae Reveals an Antigen Involved in Shell Biomineralization
Source: PubMed Central journal article supplement (PMC4805170; doi:10.1371/journal.pone.0152210), 2016-03-23
Supplement: pone.0152210.s001.pdf [file pone.0152210.s001.pdf]

## Supporting information

Calvo-Iglesias et al.

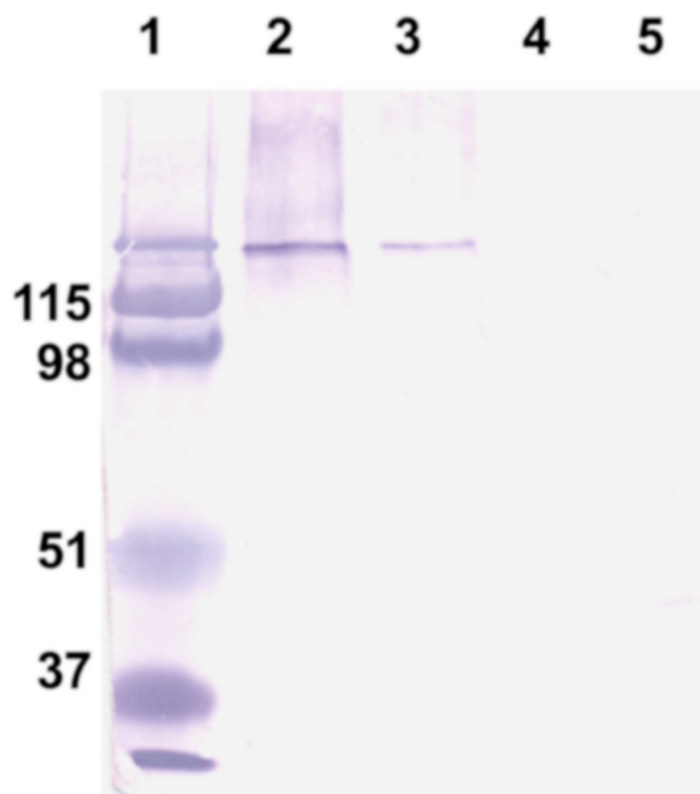

**S1 Fig. Western blot assays on adult tissues of *Mytilus galloprovincialis*.**

SDS-PAGE 8% under non-reducing conditions. (1) molecular weight markers (kDa); (2, 3) mantle edge ; (4) labial palp; (5) byssal retractor muscle.
