# Supplementary material for: Characterization of a Monoclonal Antibody Directed against Mytilus spp Larvae Reveals an Antigen Involved in Shell Biomineralization
Source: PubMed Central journal article supplement (PMC4805170; doi:10.1371/journal.pone.0152210), 2016-03-23
Supplement: pone.0152210.s002.pdf [file pone.0152210.s002.pdf]

## Supporting information

Calvo-Iglesias et al.

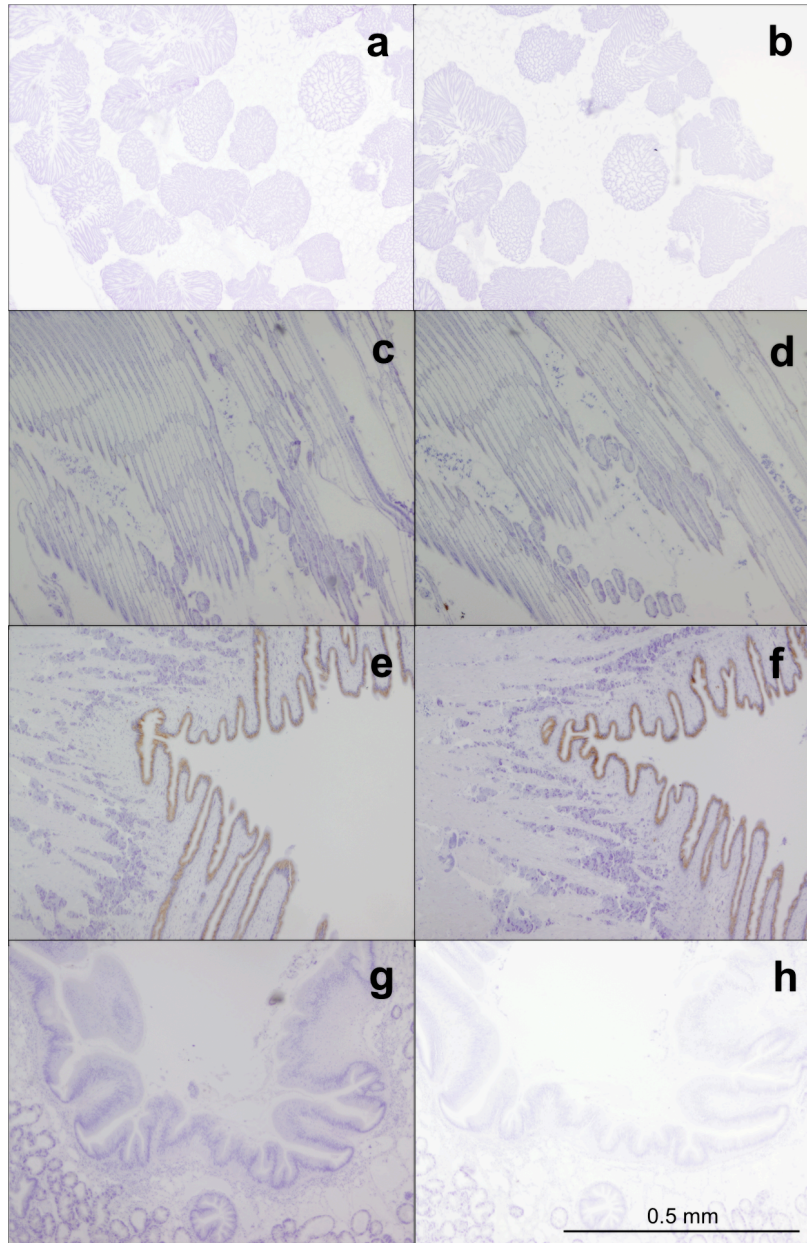

### S2 Fig. Immunostaining of adult tissues of *M. Galloprovincialis*.

Microphotographs were taken at 10 $\times$ . Samples of gonadal tissue (a,b), gills (c,d), foot (e, f) and digestive gland (g, h) were incubated with antibody diluent (a, c, e,g) or M22.8 (b,d,f,h) and revealed with DAB.
